# Supplementary material for: Construction of octenyl succinic anhydride modified porous starch for improving bioaccessibility of β-carotene in emulsions
Source: Royal Society of Chemistry journal article supplement (doi:10.1039/c9ra10079b), 2020-01-01
Supplement: c9ra10079b1.pdf [file c9ra10079b1.pdf]

### Supporting Information

**Table S1.** Free OSA content of OSA modified starches detected by <sup>1</sup>H NMR

| Samples  | Peak area of methyl proton |                          | Free OSA content<br>(mmol) |
|----------|----------------------------|--------------------------|----------------------------|
|          | Mesitylene                 | OSA modified<br>starches |                            |
| 3%OSA@NS | 18.10                      | 2.95                     | 0.3522±0.0105              |
| 3%OSA@PS | 20.17                      | 3.12                     | 0.3338±0.0065              |

<sup>a</sup>Values are given as mean ± standard deviation.

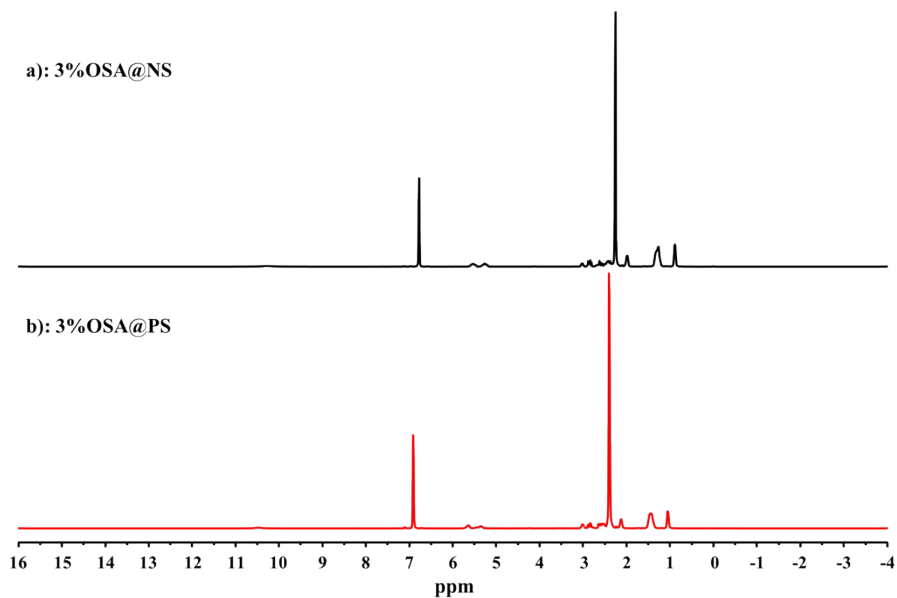

**Figure S1.** The <sup>1</sup>H NMR spectra of free OSA (mesitylene as an internal standard) of 3%OSA@NS (a) and 3%OSA@PS (b).

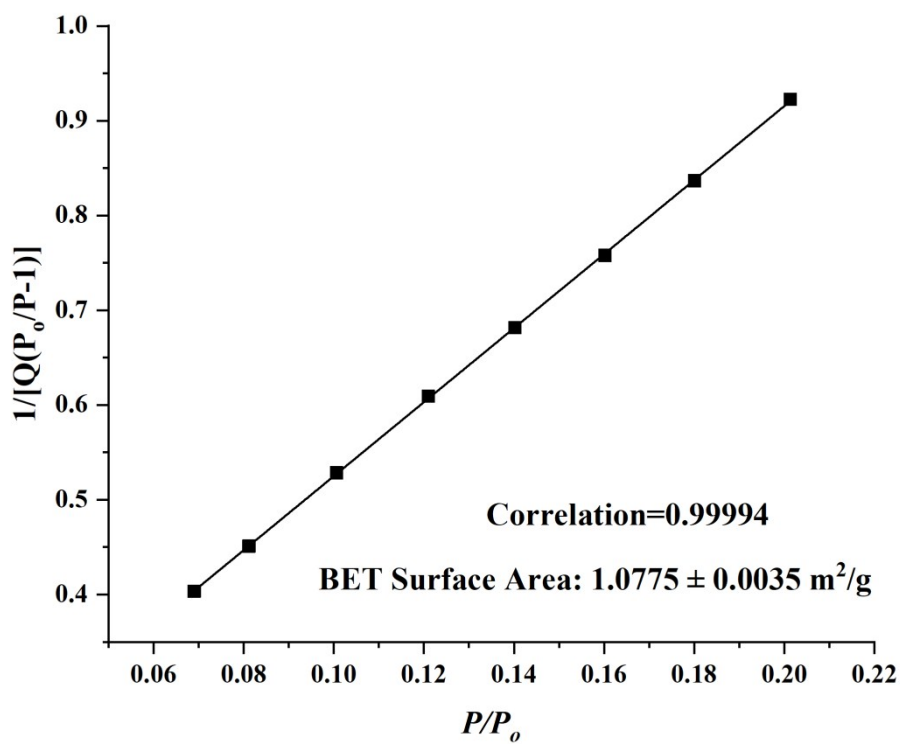

**Figure S2.** BET surface area plot for PS calculated from the isotherm.

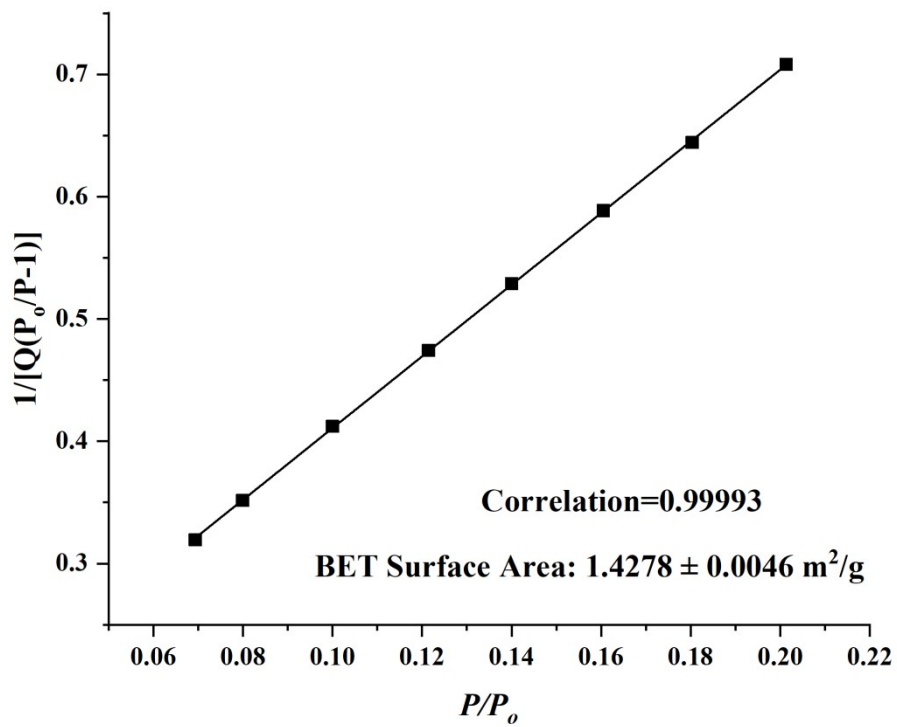

**Figure S3.** BET surface area plot for 5%OSA@PS calculated from the isotherm.

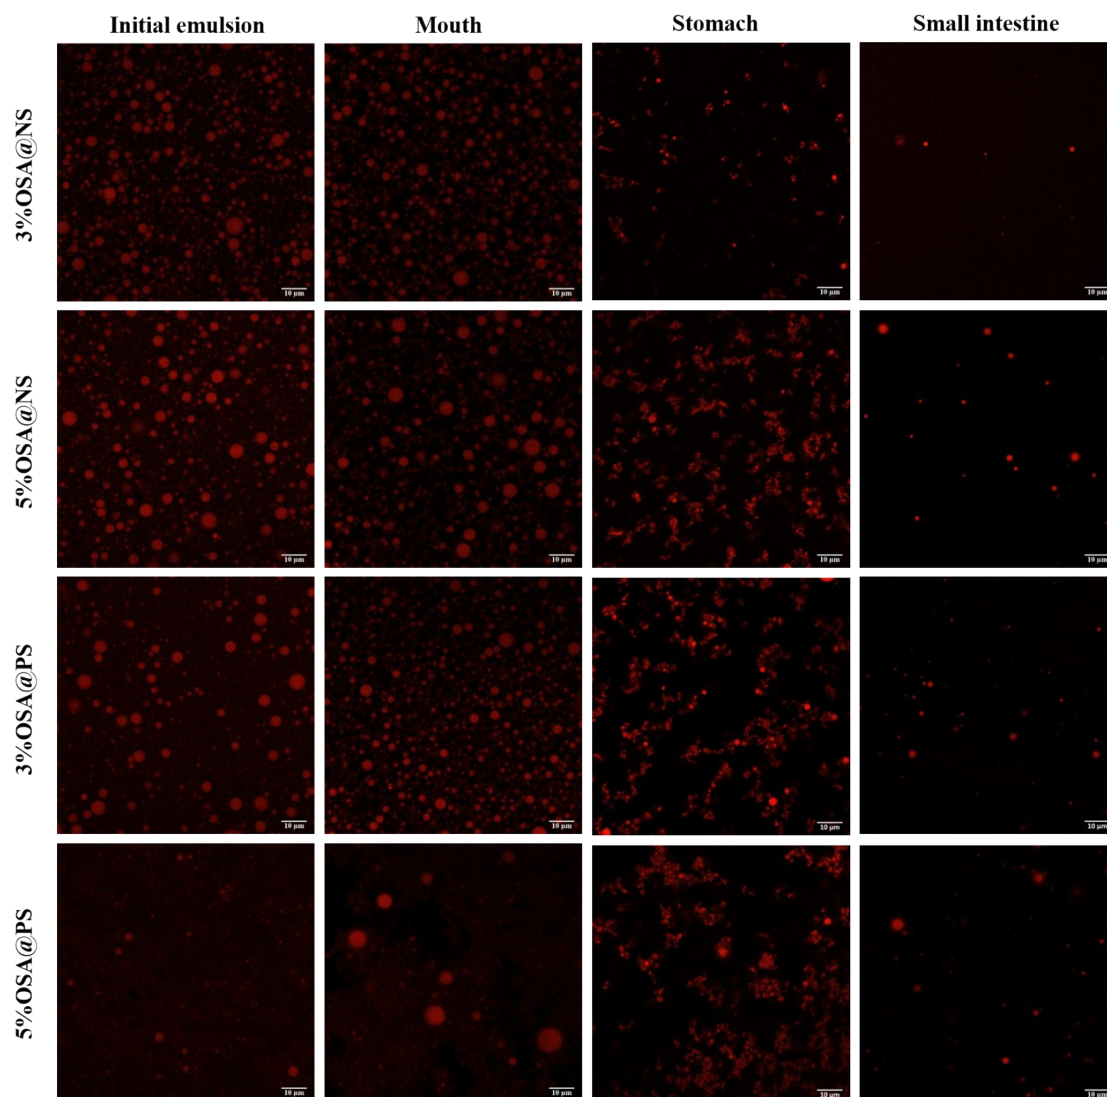

**Figure S4.** Changes in the microstructure (determined by CLSM) of emulsions containing  $\beta$ -carotene during in vitro digestion

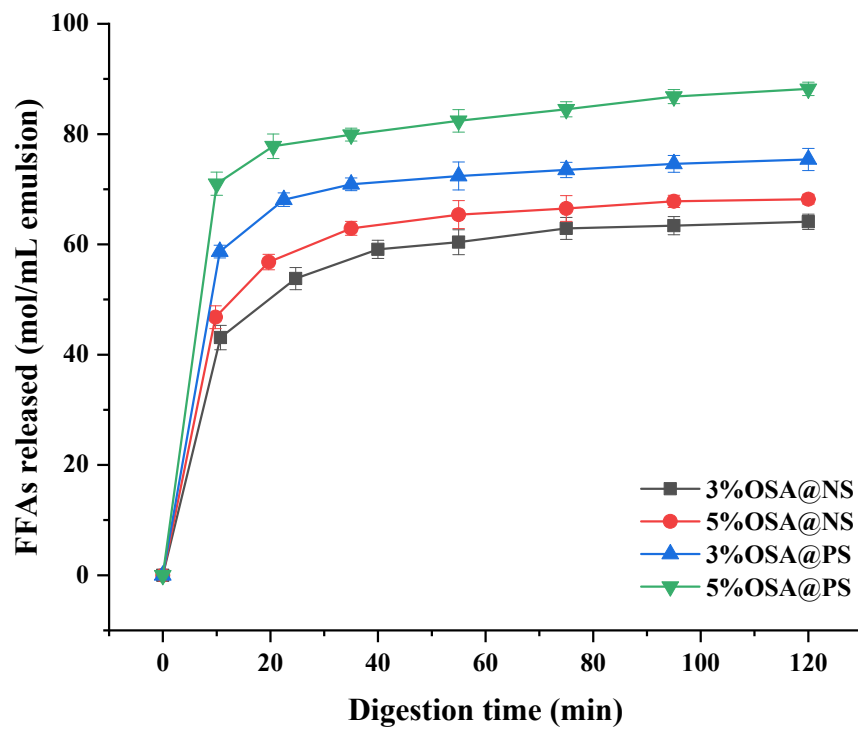

**Figure S5.** FFAs release profiles from emulsions stabilized as a function of small intestine digestion time.
